# Supplementary material for: Volatile Compounds in Actinomycete Communities: A New Tool for Biosynthetic Gene Cluster Activation, Cooperative Growth Promotion, and Drug Discovery
Source: Cells. 2022 Nov 5;11(21):3510. doi: 10.3390/cells11213510 (PMC9655753; doi:10.3390/cells11213510)
Supplement: Supplementary file 1 [file cells-11-03510-s001.zip]

Archive with 6 entries (6 files):
- Figure S1. Complete panel CS057.jpg
- Figure S2. Dereplication CS194.jpg
- LC-MS dereplication.pdf
- Table S19. rmc gene cluster.pdf
- Tables S1-S13. Dual co-cultures.pdf
- Tables S14-S18. Multiple co-cultures.pdf
