# Supplementary material for: Volatile Compounds in Actinomycete Communities: A New Tool for Biosynthetic Gene Cluster Activation, Cooperative Growth Promotion, and Drug Discovery
Source: Cells. 2022 Nov 5;11(21):3510. doi: 10.3390/cells11213510 (PMC9655753; doi:10.3390/cells11213510)
Supplement: Supplementary file 1 [file cells-11-03510-s001.zip › LC-MS dereplication.pdf]

## LC-MS dereplication.

### Section 3.2. New or incremented antibiotic production in VOC chambers

CS014:

**Collismycin A-B**,  $C_{13}H_{13}N_3O_2S$ :

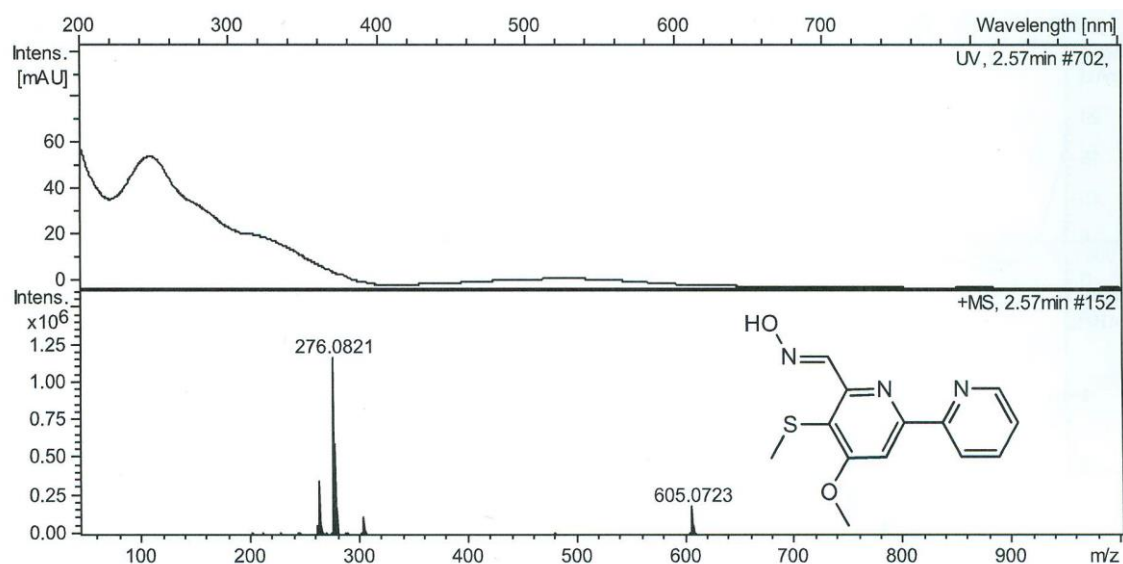

**Collismycin C**,  $C_{13}H_{14}N_2O_2S$ :

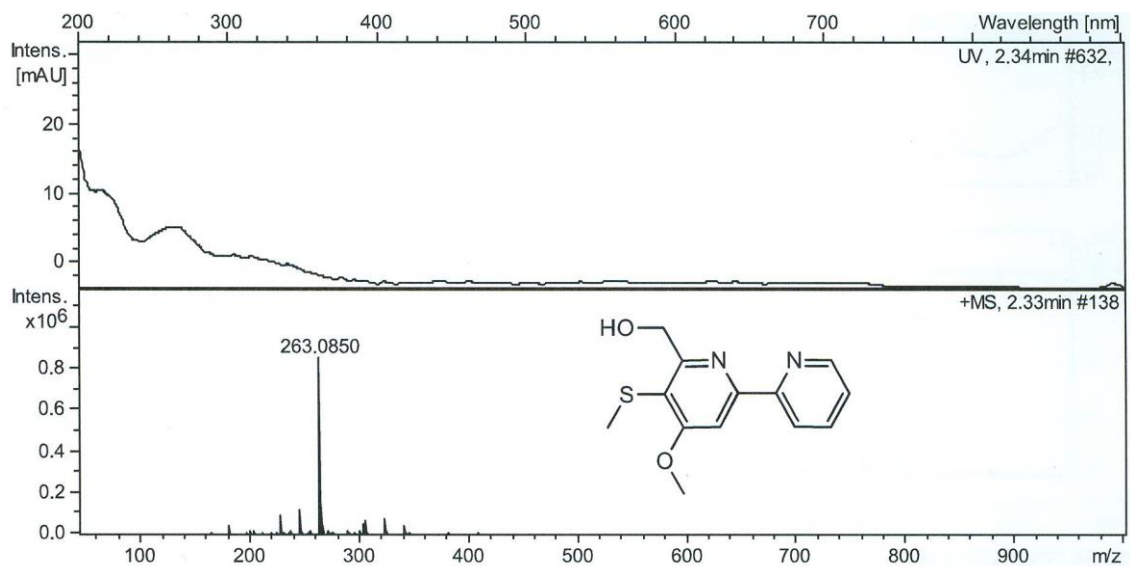

Figure 1 displays the UV-Vis and MS spectra of compound 1. The top panel shows the UV-Vis spectrum (UV, 4.39min #1247) with intensity in mAU versus wavelength in nm, ranging from 200 to 900 nm. The spectrum shows a broad peak around 250 nm and a smaller peak around 300 nm. The bottom panel shows the MS spectrum (+MS, 4.39min #260) with intensity in  $\times 10^5$  versus  $m/z$ , ranging from 0 to 900  $m/z$ . The base peak is at  $m/z$  258.0696. A chemical structure of compound 1 is shown, which is 4-(4-cyano-2-methoxyphenyl)pyridine. The structure consists of a pyridine ring connected at the 4-position to a benzene ring. The benzene ring has a methoxy group (-OCH<sub>3</sub>) at the 1-position and a cyano group (-C≡N) at the 3-position.

Figure 2 displays the UV-Vis and MS spectra of compound 1. The top panel shows the UV-Vis spectrum (UV, 2.96min #820) with intensity in mAU versus wavelength in nm. The bottom panel shows the MS spectrum (+MS, 2.96min #175) with intensity in  $\times 10^6$  versus  $m/z$ . The chemical structure of compound 1 is also shown.

**Granaticin C, C<sub>28</sub>H<sub>30</sub>O<sub>12</sub>:**

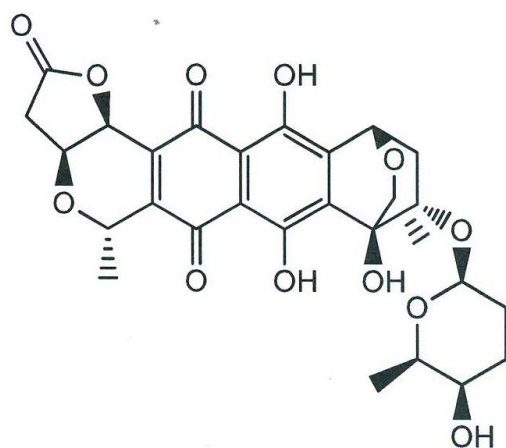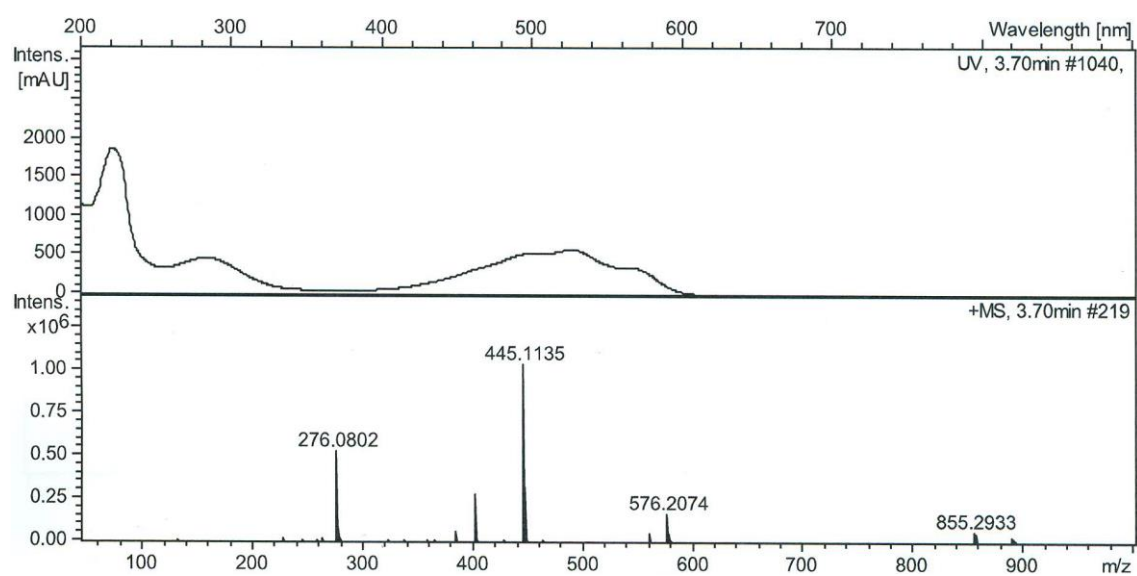

**CS081a:**

**Cosmomycin D, C<sub>60</sub>H<sub>88</sub>N<sub>2</sub>O<sub>22</sub>:**

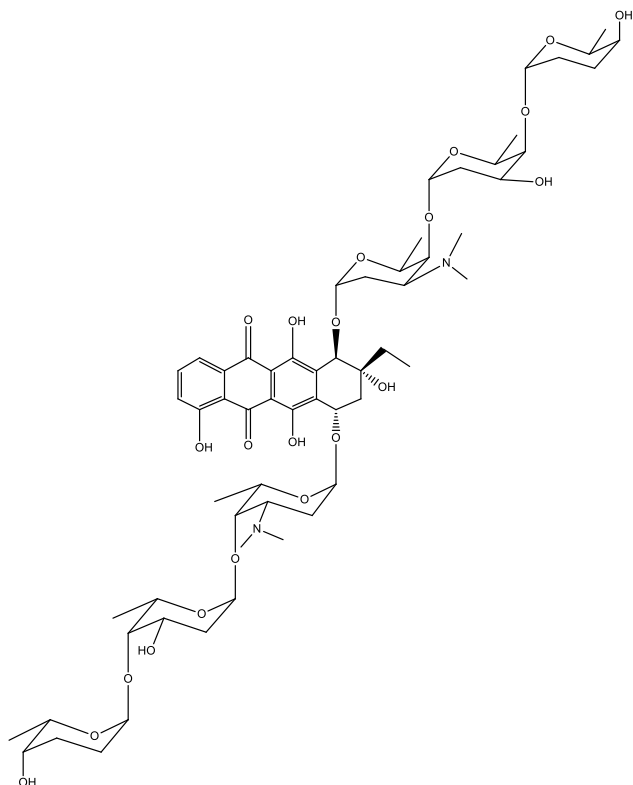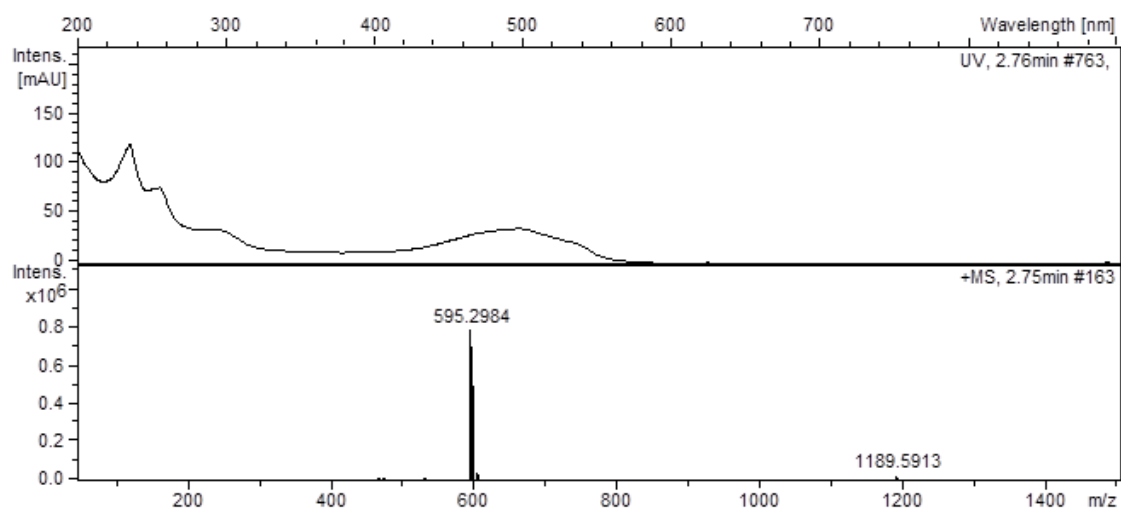

**CS057:**

**Cycloheximide, C<sub>15</sub>H<sub>23</sub>NO<sub>4</sub>:**

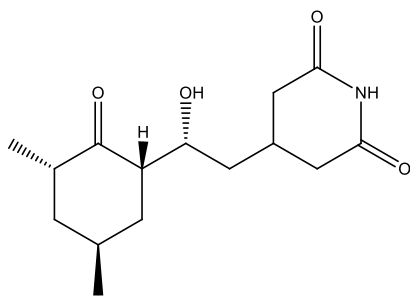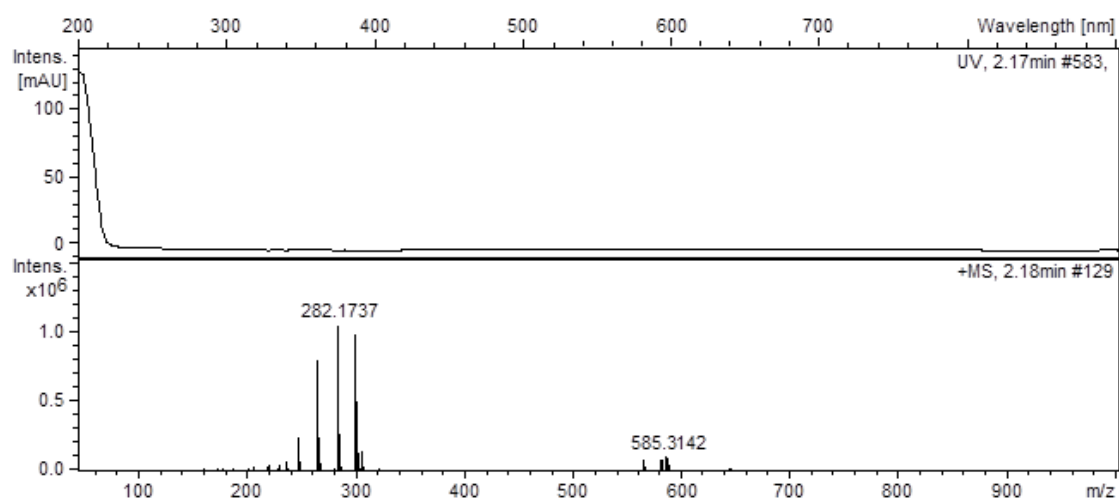

**Actiphenol, C<sub>15</sub>H<sub>17</sub>NO<sub>4</sub>:**

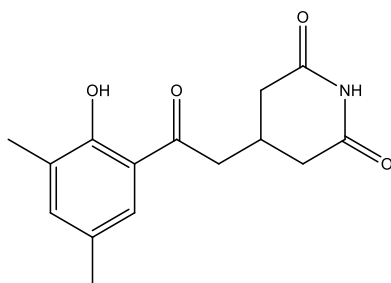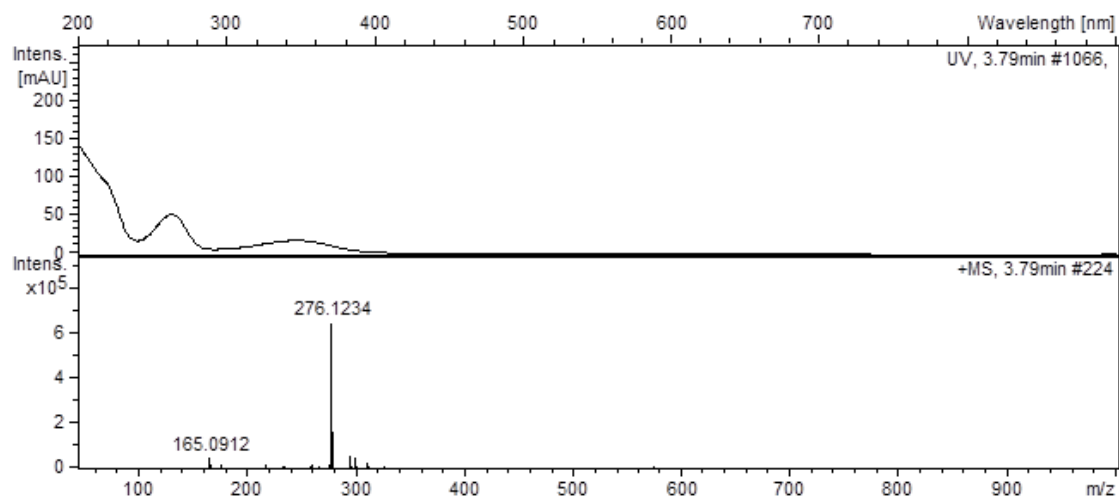

**CS090a:**

**Maltophilin, C<sub>29</sub>H<sub>38</sub>N<sub>2</sub>O<sub>6</sub>:**

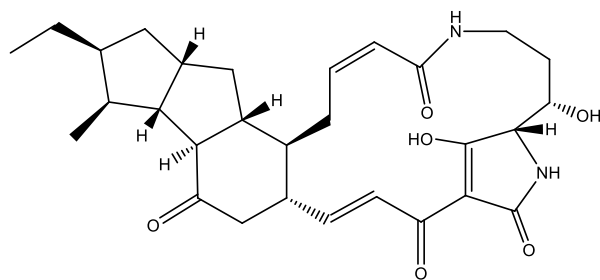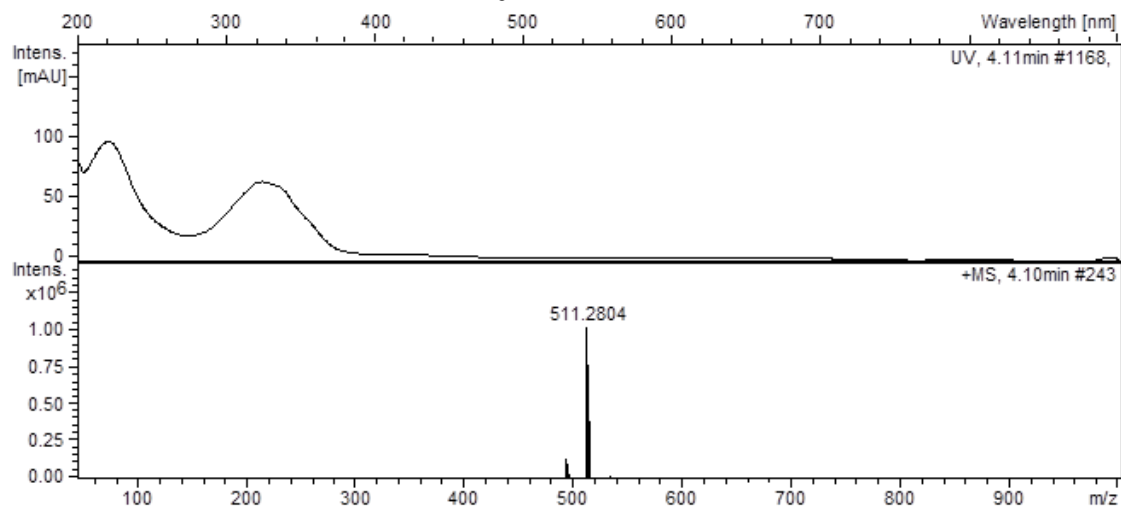

**Alteramide A, C<sub>29</sub>H<sub>38</sub>N<sub>2</sub>O<sub>6</sub>:**

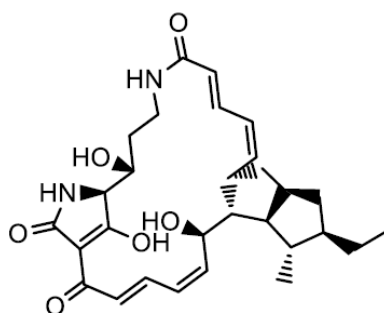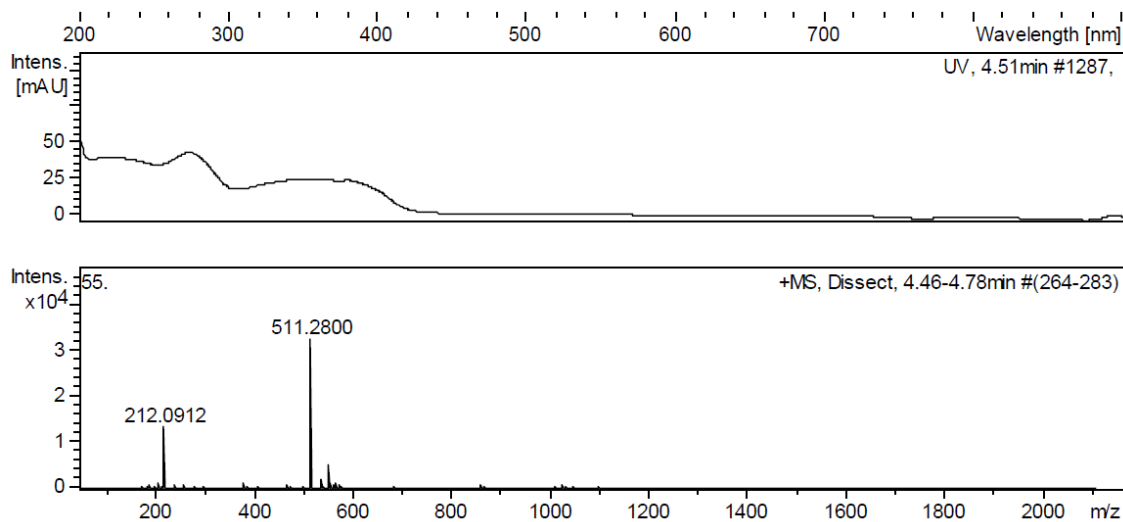

CS194:

**Piprazinedione XR 334, C<sub>19</sub>H<sub>16</sub>N<sub>2</sub>O<sub>3</sub>:**

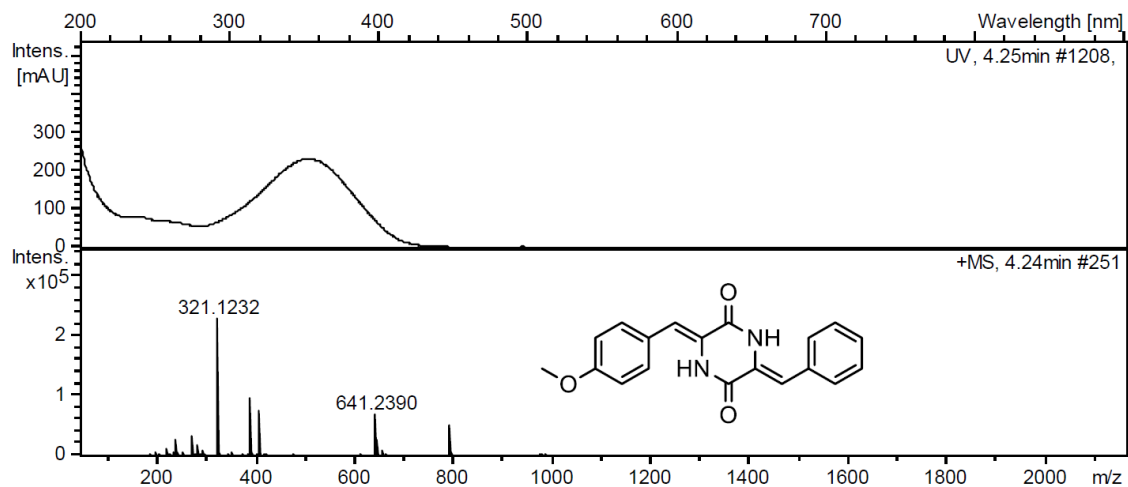

**Piprazinedione XR 330, C<sub>20</sub>H<sub>18</sub>N<sub>2</sub>O<sub>3</sub>:**

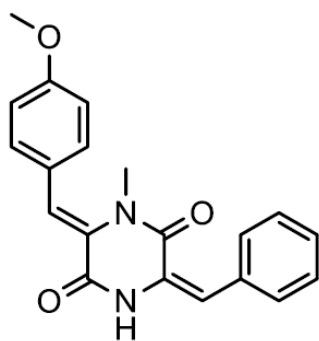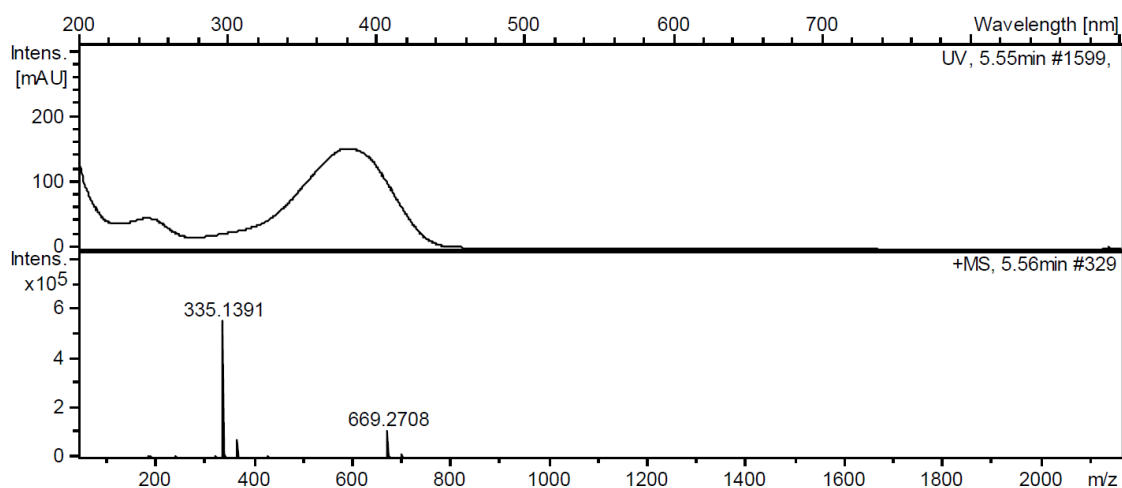

**CS149:**

**Rumycin 1, C<sub>78</sub>H<sub>111</sub>N<sub>17</sub>O<sub>26</sub>:**

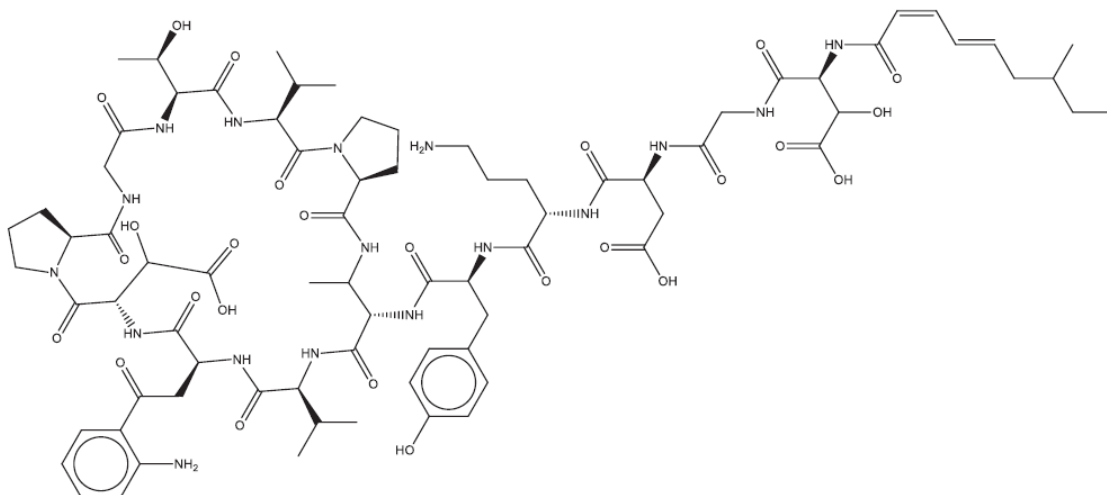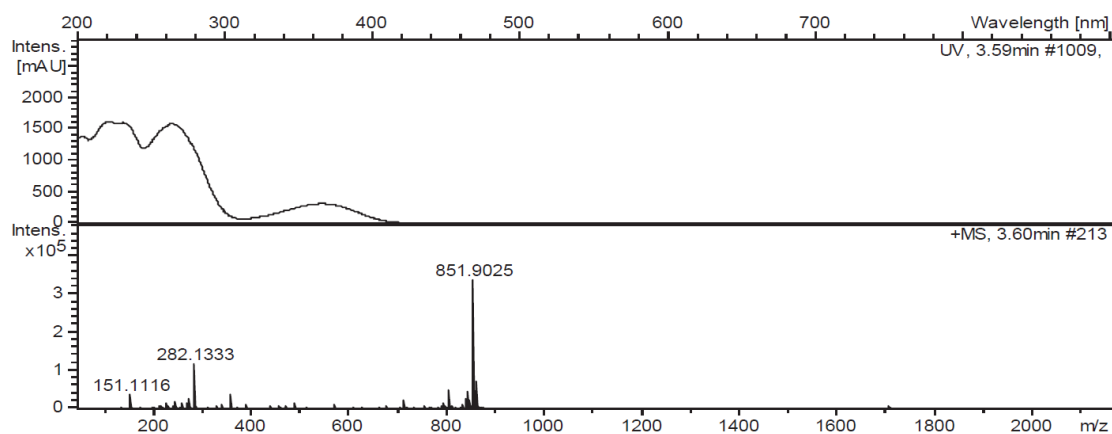

**Rumycin 2, C<sub>79</sub>H<sub>113</sub>N<sub>17</sub>O<sub>26</sub>:**

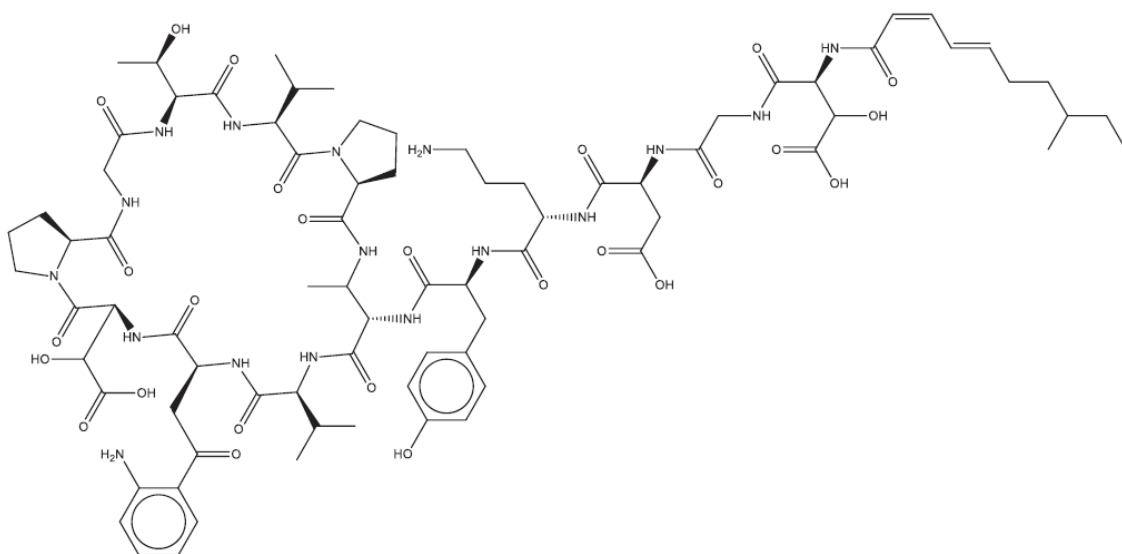

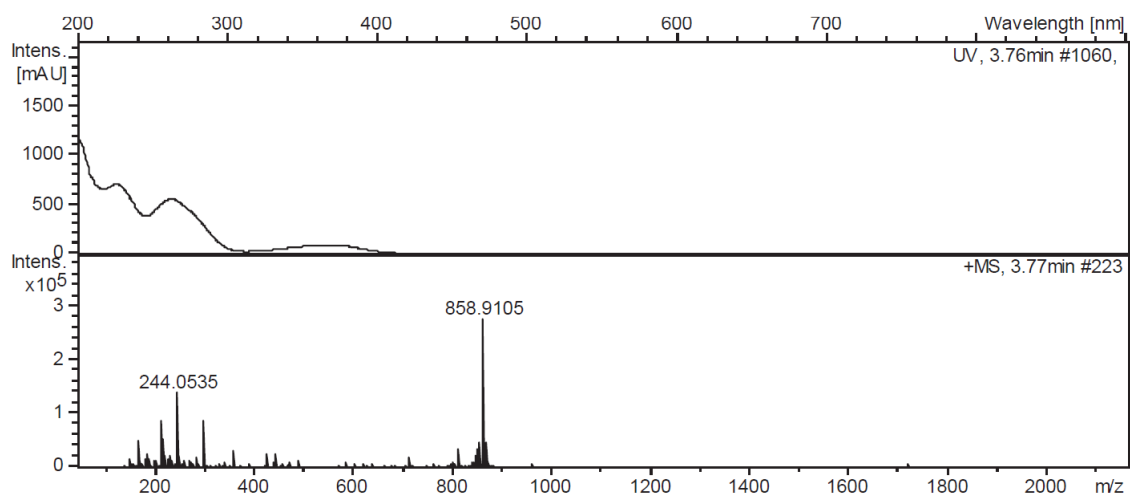

### Section 3.3. Effect of VOCs in multiple co-culture

CS065a:

Alteramide A, C<sub>29</sub>H<sub>38</sub>N<sub>2</sub>O<sub>6</sub>:

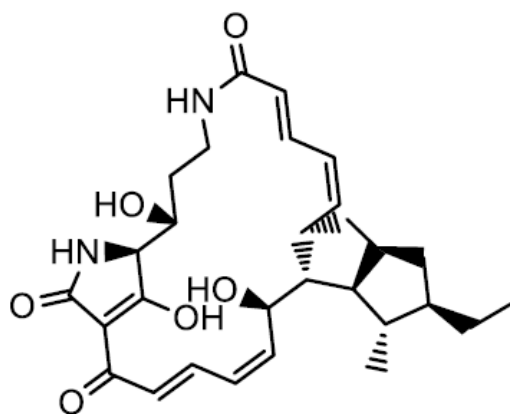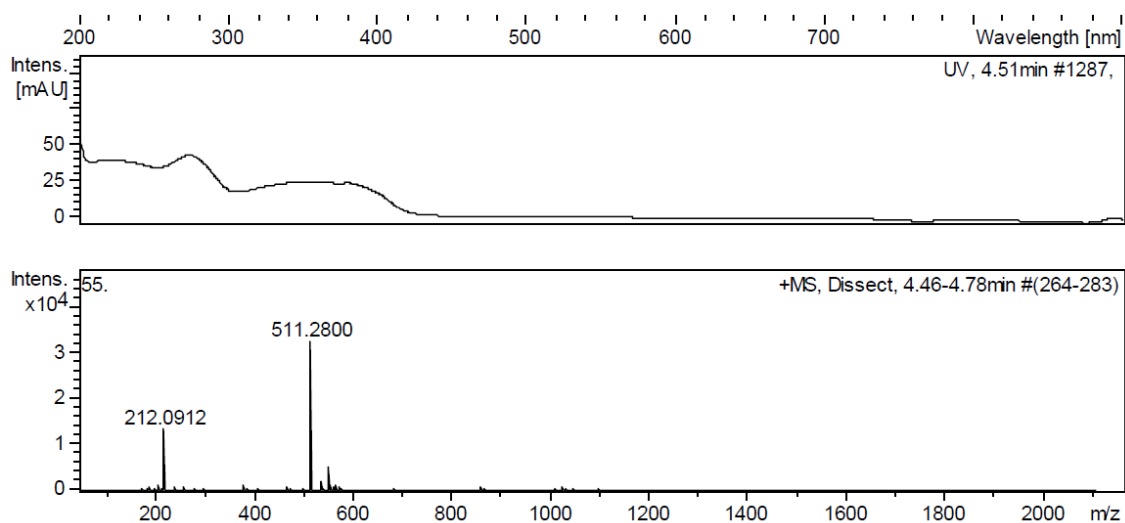

**Chromomycin A3, C<sub>57</sub>H<sub>82</sub>O<sub>26</sub>:**

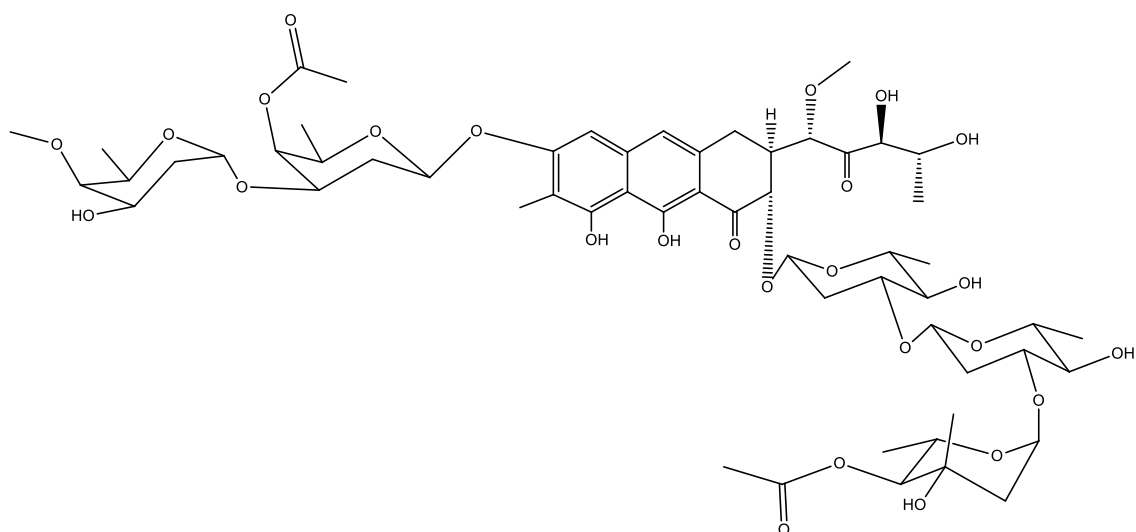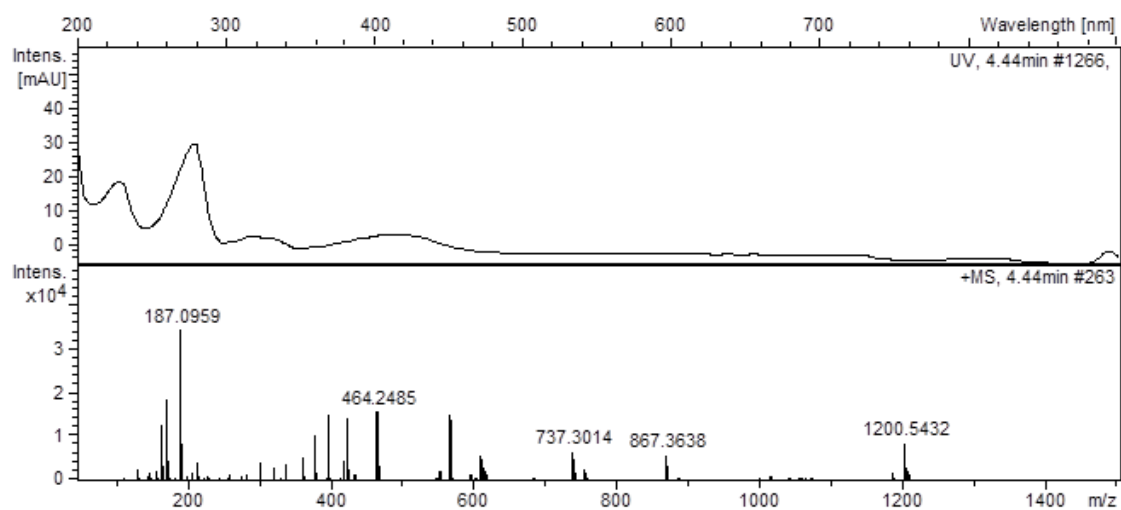

**Overview of the dereplication analysis.**

| Compound        | Molecular formula                                               | Measured mass | Calculated mass | Most prominent ions  | UV max (nm)                      |
|-----------------|-----------------------------------------------------------------|---------------|-----------------|----------------------|----------------------------------|
| Collismycin A-B | C <sub>13</sub> H <sub>13</sub> N <sub>3</sub> O <sub>2</sub> S | 276.0821      | 275.33          | 276.0821<br>605.0723 | 249,5<br>332,7<br>469,8          |
| Collismycin C   | C <sub>13</sub> H <sub>14</sub> N <sub>2</sub> O <sub>2</sub> S | 263.0850      | 262.33          | 263.0850             | 225,0<br>249,5<br>332,7<br>469,8 |

|                           |                             |           |         |                                                           |                                  |
|---------------------------|-----------------------------|-----------|---------|-----------------------------------------------------------|----------------------------------|
| Collismycin D             | $C_{13}H_{11}N_3OS$         | 258.0696  | 257.32  | 258.0696<br>574.1917                                      | 225,0<br>332,7<br>469,8          |
| Granaticin A              | $C_{22}H_{20}O_{10}$        | 445.1136  | 444.39  | 276.0801<br>445.1136<br>906.2452                          | 215,3<br>280,9<br>494,2          |
| Granaticin C              | $C_{28}H_{30}O_{12}$        | 576.2074  | 558.54  | 276.0802<br>445.1135<br>576.2074<br>855.2933              | 215,3<br>280,9<br>494,2          |
| Cosmomycin D              | $C_{60}H_{88}N_2O_{22}$     | 1189.5913 | 1189.36 | 595.2984<br>1189.5913                                     | 235,4<br>255,0<br>295,0<br>493,5 |
| Cycloheximide             | $C_{15}H_{23}NO_4$          | 282.1737  | 281.35  | 282.1737<br>585.3142                                      | 200,0                            |
| Actiphenol                | $C_{15}H_{17}NO_4$          | 276.1234  | 275.30  | 165.0912<br>276.1234                                      | 216,5<br>262,4<br>345,2          |
| Maltophilin               | $C_{29}H_{38}N_2O_6$        | 511.2804  | 510.63  | 511.2804                                                  | 222,6<br>322,8                   |
| Alteramide A              | $C_{29}H_{38}N_2O_6$        | 511.2800  | 510.63  | 212.0912<br>511.2800                                      | 273,5<br>360,1                   |
| Piperazinedione<br>XR 334 | $C_{19}H_{16}N_2O_3$        | 321.1232  | 320.35  | 321.1232<br>641.2390                                      | 241,0<br>334,6                   |
| Piperazinedione<br>XR 330 | $C_{20}H_{18}N_2O_3$        | 335.1391  | 334.38  | 335.1391<br>669.2708                                      | 241,0<br>334,6                   |
| Rumycin 1                 | $C_{78}H_{111}N_{17}O_{26}$ | 851.9025  | 1702.84 | 151.1116<br>282.1333<br>851.9025                          | 231,2<br>264,4<br>365,1          |
| Rumycin 2                 | $C_{79}H_{113}N_{17}O_{26}$ | 858.9105  | 1716.87 | 244.0535<br>858.9105                                      | 226,9<br>261,8<br>365,7          |
| Chromomycin<br>A3         | $C_{57}H_{82}O_{26}$        | 1200.5432 | 1183.26 | 187.0959<br>464.2485<br>737.3014<br>867.3638<br>1200.5432 | 229,3<br>277,8<br>317,3<br>403,7 |
