# Supplementary material for: Volatile Compounds in Actinomycete Communities: A New Tool for Biosynthetic Gene Cluster Activation, Cooperative Growth Promotion, and Drug Discovery
Source: Cells. 2022 Nov 5;11(21):3510. doi: 10.3390/cells11213510 (PMC9655753; doi:10.3390/cells11213510)
Supplement: Supplementary file 1 [file cells-11-03510-s001.zip › Table S19. rmc gene cluster.pdf]

**Table S19.** Predicted function of *rnc* genes.

| <b>Gene</b>  | <b>Function</b>                                            | <b>Closest homologue</b>                    |                |
|--------------|------------------------------------------------------------|---------------------------------------------|----------------|
| <i>rnc1</i>  | diaminobutyric acid synthase C                             | <i>Streptomyces viridochromogenes</i>       | AEG64688.1     |
| <i>rnc2</i>  | argininosuccinate lyase                                    | <i>Streptomyces globisporus</i>             | MCC8479050.1   |
| <i>rnc3</i>  | pyridoxal-phosphate dependent enzyme (cysteine synthetase) | <i>Streptomyces globisporus</i>             | MCC8479049.1   |
| <i>rnc4</i>  | NRPS                                                       | <i>Streptomyces</i> sp. CAI-121             | NUV71303.1     |
| <i>rnc5</i>  | Kinase                                                     | <i>Streptomyces badius</i>                  | WP_199887694.1 |
| <i>rnc6</i>  | TauD/TfdA family dioxygenase                               | Multispecies - <i>Streptomyces</i>          | WP_069738900.1 |
| <i>rnc7</i>  | tryptophan 2,3-dioxygenase family protein                  | Multispecies - <i>Streptomyces</i>          | WP_079149654.1 |
| <i>rnc8</i>  | fatty acyl-AMP ligase                                      | <i>Streptomyces globisporus</i>             | MCC8479045.1   |
| <i>rnc9</i>  | acyl-CoA dehydrogenase family protein                      | <i>Streptomyces globisporus</i>             | MCC8479044.1   |
| <i>rnc10</i> | acyl-CoA dehydrogenase                                     | <i>Streptomyces globisporus</i>             | MCC8479043.1   |
| <i>rnc11</i> | acyl carrier protein                                       | <i>Streptomyces globisporus</i>             | MCC8479042.1   |
| <i>rnc12</i> | NRPS                                                       | <i>Streptomyces badius</i>                  | WP_199887692.1 |
| <i>rnc13</i> | NRPS                                                       | <i>Streptomyces globisporus</i>             | MCC8482945.1   |
| <i>rnc14</i> | NRPS                                                       | <i>Streptomyces globisporus</i>             | MCC8482950.1   |
| <i>rnc15</i> | NRPS                                                       | <i>Streptomyces globisporus</i>             | MCC8482893.1   |
| <i>rnc16</i> | NRPS                                                       | <i>Streptomyces globisporus</i>             | MCC8482894.1   |
| <i>rnc17</i> | NRPS                                                       | <i>Streptomyces globisporus</i>             | MCC8482950.1   |
| <i>rnc18</i> | NRPS                                                       | <i>Streptomyces globisporus</i>             | MCC8482386.1   |
| <i>rnc19</i> | NRPS                                                       | <i>Streptomyces globisporus</i>             | MCC8482387.1   |
| <i>rnc20</i> | MbtH family protein                                        | <i>Streptomyces badius</i>                  | WP_199889602.1 |
| <i>rnc21</i> | DedA family protein                                        | <i>Streptomyces parvus</i>                  | WP_148904607.1 |
| <i>rnc22</i> | ABC transporter ATP-binding protein                        | <i>Streptomyces parvus</i>                  | WP_148904605.1 |
| <i>rnc23</i> | ABC transporter permease subunit                           | <i>Streptomyces</i> sp. CAI 127             | WP_175515771.1 |
| <i>rnc24</i> | response regulator transcription factor (LuxR)             | Multispecies - <i>Streptomyces</i>          | WP_176735228.1 |
| <i>rnc25</i> | TauD/TfdA family dioxygenase                               | Multispecies - <i>Streptomyces</i>          | WP_069737015.1 |
| <i>rnc26</i> | Signal transduction histidine kinase                       | <i>Streptomyces</i> sp. CAI 127             | NUW01750.1     |
| <i>rnc27</i> | alpha/beta hydrolase                                       | <i>Streptomyces</i> sp. CAI 127             | WP_175515773.1 |
| <i>rnc28</i> | ABC transporter permease                                   | <i>Streptomyces</i> sp. CAI 127             | WP_175515774.1 |
| <i>rnc29</i> | ATP-binding cassette domain-containing protein             | <i>Streptomyces</i> sp. CAI 127             | WP_175515775.1 |
| <i>rnc30</i> | SCO5389 family protein                                     | <i>Streptomyces</i> sp. CB02366             | WP_073763754.1 |
| <i>rnc31</i> | LLM class flavin-dependent oxidoreductase                  | <i>Streptomyces</i> sp. CAI 127             | WP_175515776.1 |
| <i>rnc32</i> | ATP/GTP-binding protein                                    | <i>Streptomyces globisporus</i>             | WP_118906321.1 |
| <i>rnc33</i> | ABC transporter permease subunit                           | <i>Streptomyces globisporus</i>             | WP_118906320.1 |
| <i>rnc34</i> | ATP-binding cassette domain-containing protein             | <i>Streptomyces</i> sp. SID4931             | MYV62918.1     |
| <i>rnc35</i> | ABC transporter permease subunit                           | <i>Streptomyces</i> sp. SID14515            | WP_164612903.1 |
| <i>rnc36</i> | ABC transporter ATP-binding protein                        | <i>Streptomyces filamentosus</i> NRRL 15998 | EFE77641.1     |
