# Supplementary material for: Volatile Compounds in Actinomycete Communities: A New Tool for Biosynthetic Gene Cluster Activation, Cooperative Growth Promotion, and Drug Discovery
Source: Cells. 2022 Nov 5;11(21):3510. doi: 10.3390/cells11213510 (PMC9655753; doi:10.3390/cells11213510)
Supplement: Supplementary file 1 [file cells-11-03510-s001.zip › Tables S1-S13. Dual co-cultures.pdf]

**Table S1.** Overview of the dual co-culture against *Streptomyces* sp. CS014.

| Strain | Growth medium | Outcomes in <i>Streptomyces</i> sp. CS014                                                |
|--------|---------------|------------------------------------------------------------------------------------------|
| CS057  | SFM           | No effects observed                                                                      |
|        | YMA           | Increased bioactivity against <i>M. luteus</i> (collismycin and granaticin) <sup>1</sup> |
|        | R5A           | No effects observed                                                                      |
| CS065a | SFM           | No effects observed                                                                      |
|        | YMA           | No effects observed                                                                      |
|        | R5A           | No effects observed                                                                      |
| CS081a | SFM           | No effects observed                                                                      |
|        | YMA           | Increased bioactivity against <i>M. luteus</i> (collismycin and granaticin) <sup>1</sup> |
|        | R5A           | No effects observed                                                                      |
| CS090a | SFM           | No effects observed                                                                      |
|        | YMA           | Increased bioactivity against <i>M. luteus</i> (collismycin and granaticin) <sup>1</sup> |
|        | R5A           | No effects observed                                                                      |
| CS113  | SFM           | No effects observed                                                                      |
|        | YMA           | No effects observed                                                                      |
|        | R5A           | No effects observed                                                                      |
| CS131  | SFM           | No effects observed                                                                      |
|        | YMA           | Increased bioactivity against <i>M. luteus</i> (collismycin and granaticin) <sup>1</sup> |
|        | R5A           | No effects observed                                                                      |
| CS147  | SFM           | No effects observed                                                                      |
|        | YMA           | No effects observed                                                                      |
|        | R5A           | No effects observed                                                                      |
| CS149  | SFM           | No effects observed                                                                      |
|        | YMA           | Increased bioactivity against <i>M. luteus</i> (collismycin and granaticin) <sup>1</sup> |
|        | R5A           | No effects observed                                                                      |
| CS159  | SFM           | No effects observed                                                                      |
|        | YMA           | No effects observed                                                                      |
|        | R5A           | No effects observed                                                                      |
| CS194  | SFM           | No effects observed                                                                      |
|        | YMA           | No effects observed                                                                      |
|        | R5A           | No effects observed                                                                      |
| CS207  | SFM           | No effects observed                                                                      |
|        | YMA           | No effects observed                                                                      |
|        | R5A           | No effects observed                                                                      |
| CS227  | SFM           | No effects observed                                                                      |
|        | YMA           | No effects observed                                                                      |
|        | R5A           | No effects observed                                                                      |

<sup>1</sup> Collismycin was only produced in coculture. Higher granaticin production in coculture compared to monoculture.

**Table S2.** Overview of the dual co-culture against *Streptomyces* sp. CS057.

| Strain | Growth medium | Outcomes in <i>Streptomyces</i> sp. CS057                                                                              |
|--------|---------------|------------------------------------------------------------------------------------------------------------------------|
| CS014  | SFM           | No effects observed                                                                                                    |
|        | YMA           | No effects observed                                                                                                    |
|        | R5A           | No effects observed                                                                                                    |
| CS065a | SFM           | No effects observed                                                                                                    |
|        | YMA           | No effects observed                                                                                                    |
|        | R5A           | No effects observed                                                                                                    |
| CS081a | SFM           | No effects observed                                                                                                    |
|        | YMA           | Increased bioactivity against <i>M. luteus</i> and <i>E. weberi</i> (cycloheximide and actiphenol) <sup>1</sup>        |
|        | R5A           | No effects observed                                                                                                    |
| CS090a | SFM           | No effects observed                                                                                                    |
|        | YMA           | No effects observed                                                                                                    |
|        | R5A           | No effects observed                                                                                                    |
| CS113  | SFM           | No effects observed                                                                                                    |
|        | YMA           | No effects observed                                                                                                    |
|        | R5A           | No effects observed                                                                                                    |
| CS131  | SFM           | No effects observed                                                                                                    |
|        | YMA           | No effects observed                                                                                                    |
|        | R5A           | No effects observed                                                                                                    |
| CS147  | SFM           | No effects observed                                                                                                    |
|        | YMA           | No effects observed                                                                                                    |
|        | R5A           | No effects observed                                                                                                    |
| CS149  | SFM           | No effects observed                                                                                                    |
|        | YMA           | No effects observed                                                                                                    |
|        | R5A           | No effects observed                                                                                                    |
| CS159  | SFM           | No effects observed                                                                                                    |
|        | YMA           | Slight increased bioactivity against <i>M. luteus</i> and <i>E. weberi</i> (cycloheximide and actiphenol) <sup>1</sup> |
|        | R5A           | No effects observed                                                                                                    |
| CS194  | SFM           | No effects observed                                                                                                    |
|        | YMA           | No effects observed                                                                                                    |
|        | R5A           | No effects observed                                                                                                    |
| CS207  | SFM           | No effects observed                                                                                                    |
|        | YMA           | No effects observed                                                                                                    |
|        | R5A           | No effects observed                                                                                                    |
| CS227  | SFM           | No effects observed                                                                                                    |
|        | YMA           | No effects observed                                                                                                    |
|        | R5A           | No effects observed                                                                                                    |

<sup>1</sup> Only traces of cycloheximide and actiphenol were detected in monoculture.

**Table S3.** Overview of the dual co-culture against *Streptomyces* sp. CS065a.

| Strain | Growth medium | Outcomes in <i>Streptomyces</i> sp. CS065a |
|--------|---------------|--------------------------------------------|
| CS014  | SFM           | No effects observed                        |
|        | YMA           | No effects observed                        |
|        | R5A           | No effects observed                        |
| CS057  | SFM           | No effects observed                        |
|        | YMA           | No effects observed                        |
|        | R5A           | No effects observed                        |
| CS081a | SFM           | No effects observed                        |
|        | YMA           | No effects observed                        |
|        | R5A           | No effects observed                        |
| CS090a | SFM           | No effects observed                        |
|        | YMA           | No effects observed                        |
|        | R5A           | No effects observed                        |
| CS113  | SFM           | No effects observed                        |
|        | YMA           | No effects observed                        |
|        | R5A           | No effects observed                        |
| CS131  | SFM           | No effects observed                        |
|        | YMA           | No effects observed                        |
|        | R5A           | No effects observed                        |
| CS147  | SFM           | No effects observed                        |
|        | YMA           | No effects observed                        |
|        | R5A           | No effects observed                        |
| CS149  | SFM           | No effects observed                        |
|        | YMA           | No effects observed                        |
|        | R5A           | No effects observed                        |
| CS159  | SFM           | No effects observed                        |
|        | YMA           | No effects observed                        |
|        | R5A           | No effects observed                        |
| CS194  | SFM           | No effects observed                        |
|        | YMA           | No effects observed                        |
|        | R5A           | No effects observed                        |
| CS207  | SFM           | No effects observed                        |
|        | YMA           | No effects observed                        |
|        | R5A           | No effects observed                        |
| CS227  | SFM           | No effects observed                        |
|        | YMA           | No effects observed                        |
|        | R5A           | No effects observed                        |

**Table S4.** Overview of the dual co-culture against *Streptomyces* sp. CS081a.

| Strain | Growth medium | Outcomes in <i>Streptomyces</i> sp. CS081a                                       |
|--------|---------------|----------------------------------------------------------------------------------|
| CS014  | SFM           | No effects observed                                                              |
|        | YMA           | Increased bioactivity against <i>M. luteus</i> (cosmomycins) <sup>1</sup>        |
|        | R5A           | No effects observed                                                              |
| CS057  | SFM           | No effects observed                                                              |
|        | YMA           | No effects observed                                                              |
|        | R5A           | No effects observed                                                              |
| CS065a | SFM           | No effects observed                                                              |
|        | YMA           | No effects observed                                                              |
|        | R5A           | No effects observed                                                              |
| CS090a | SFM           | No effects observed                                                              |
|        | YMA           | No effects observed                                                              |
|        | R5A           | No effects observed                                                              |
| CS113  | SFM           | No effects observed                                                              |
|        | YMA           | No effects observed                                                              |
|        | R5A           | No effects observed                                                              |
| CS131  | SFM           | No effects observed                                                              |
|        | YMA           | No effects observed                                                              |
|        | R5A           | No effects observed                                                              |
| CS147  | SFM           | No effects observed                                                              |
|        | YMA           | No effects observed                                                              |
|        | R5A           | No effects observed                                                              |
| CS149  | SFM           | No effects observed                                                              |
|        | YMA           | No effects observed                                                              |
|        | R5A           | No effects observed                                                              |
| CS159  | SFM           | No effects observed                                                              |
|        | YMA           | Slight increased bioactivity against <i>M. luteus</i> (cosmomycins) <sup>1</sup> |
|        | R5A           | No effects observed                                                              |
| CS194  | SFM           | No effects observed                                                              |
|        | YMA           | No effects observed                                                              |
|        | R5A           | No effects observed                                                              |
| CS207  | SFM           | No effects observed                                                              |
|        | YMA           | No effects observed                                                              |
|        | R5A           | No effects observed                                                              |
| CS227  | SFM           | No effects observed                                                              |
|        | YMA           | No effects observed                                                              |
|        | R5A           | No effects observed                                                              |

<sup>1</sup> Cosmomycins were only produced in coculture.

**Table S5.** Overview of the dual co-culture against *Streptomyces* sp. CS090a.

| Strain | Growth medium | Outcomes in <i>Streptomyces</i> sp. CS090a                                       |
|--------|---------------|----------------------------------------------------------------------------------|
| CS014  | SFM           | No effects observed                                                              |
|        | YMA           | No effects observed                                                              |
|        | R5A           | No effects observed                                                              |
| CS057  | SFM           | No effects observed                                                              |
|        | YMA           | Bioactivity against <i>E. weberi</i> (maltophilins and alteramides) <sup>1</sup> |
|        | R5A           | No effects observed                                                              |
| CS065a | SFM           | No effects observed                                                              |
|        | YMA           | No effects observed                                                              |
|        | R5A           | No effects observed                                                              |
| CS081a | SFM           | No effects observed                                                              |
|        | YMA           | Bioactivity against <i>E. weberi</i> (maltophilins and alteramides) <sup>1</sup> |
|        | R5A           | No effects observed                                                              |
| CS113  | SFM           | No effects observed                                                              |
|        | YMA           | No effects observed                                                              |
|        | R5A           | No effects observed                                                              |
| CS131  | SFM           | No effects observed                                                              |
|        | YMA           | No effects observed                                                              |
|        | R5A           | No effects observed                                                              |
| CS147  | SFM           | No effects observed                                                              |
|        | YMA           | No effects observed                                                              |
|        | R5A           | No effects observed                                                              |
| CS149  | SFM           | No effects observed                                                              |
|        | YMA           | No effects observed                                                              |
|        | R5A           | No effects observed                                                              |
| CS159  | SFM           | No effects observed                                                              |
|        | YMA           | No effects observed                                                              |
|        | R5A           | No effects observed                                                              |
| CS194  | SFM           | No effects observed                                                              |
|        | YMA           | No effects observed                                                              |
|        | R5A           | No effects observed                                                              |
| CS207  | SFM           | No effects observed                                                              |
|        | YMA           | No effects observed                                                              |
|        | R5A           | No effects observed                                                              |
| CS227  | SFM           | No effects observed                                                              |
|        | YMA           | No effects observed                                                              |
|        | R5A           | No effects observed                                                              |

<sup>1</sup> Maltophilins and alteramides were only produced in coculture.

**Table S6.** Overview of the dual co-culture against *Streptomyces* sp. CS113.

| Strain | Growth medium | Outcomes in <i>Streptomyces</i> sp. CS113 |
|--------|---------------|-------------------------------------------|
| CS014  | SFM           | No effects observed                       |
|        | YMA           | No effects observed                       |
|        | R5A           | No effects observed                       |
| CS057  | SFM           | No effects observed                       |
|        | YMA           | No effects observed                       |
|        | R5A           | No effects observed                       |
| CS065a | SFM           | No effects observed                       |
|        | YMA           | No effects observed                       |
|        | R5A           | No effects observed                       |
| CS081a | SFM           | No effects observed                       |
|        | YMA           | No effects observed                       |
|        | R5A           | No effects observed                       |
| CS090a | SFM           | No effects observed                       |
|        | YMA           | No effects observed                       |
|        | R5A           | No effects observed                       |
| CS131  | SFM           | No effects observed                       |
|        | YMA           | No effects observed                       |
|        | R5A           | No effects observed                       |
| CS147  | SFM           | No effects observed                       |
|        | YMA           | No effects observed                       |
|        | R5A           | No effects observed                       |
| CS149  | SFM           | No effects observed                       |
|        | YMA           | No effects observed                       |
|        | R5A           | No effects observed                       |
| CS159  | SFM           | No effects observed                       |
|        | YMA           | No effects observed                       |
|        | R5A           | No effects observed                       |
| CS194  | SFM           | No effects observed                       |
|        | YMA           | No effects observed                       |
|        | R5A           | No effects observed                       |
| CS207  | SFM           | No effects observed                       |
|        | YMA           | No effects observed                       |
|        | R5A           | No effects observed                       |
| CS227  | SFM           | No effects observed                       |
|        | YMA           | No effects observed                       |
|        | R5A           | No effects observed                       |

**Table S7.** Overview of the dual co-culture against *Streptomyces* sp. CS131.

| Strain | Growth medium | Outcomes in <i>Streptomyces</i> sp. CS131 |
|--------|---------------|-------------------------------------------|
| CS014  | SFM           | No effects observed                       |
|        | YMA           | No effects observed                       |
|        | R5A           | No effects observed                       |
| CS057  | SFM           | No effects observed                       |
|        | YMA           | No effects observed                       |
|        | R5A           | No effects observed                       |
| CS065a | SFM           | No effects observed                       |
|        | YMA           | No effects observed                       |
|        | R5A           | No effects observed                       |
| CS081a | SFM           | No effects observed                       |
|        | YMA           | No effects observed                       |
|        | R5A           | No effects observed                       |
| CS090a | SFM           | No effects observed                       |
|        | YMA           | No effects observed                       |
|        | R5A           | No effects observed                       |
| CS113  | SFM           | No effects observed                       |
|        | YMA           | No effects observed                       |
|        | R5A           | No effects observed                       |
| CS147  | SFM           | No effects observed                       |
|        | YMA           | No effects observed                       |
|        | R5A           | No effects observed                       |
| CS149  | SFM           | No effects observed                       |
|        | YMA           | No effects observed                       |
|        | R5A           | No effects observed                       |
| CS159  | SFM           | No effects observed                       |
|        | YMA           | No effects observed                       |
|        | R5A           | No effects observed                       |
| CS194  | SFM           | No effects observed                       |
|        | YMA           | No effects observed                       |
|        | R5A           | No effects observed                       |
| CS207  | SFM           | No effects observed                       |
|        | YMA           | No effects observed                       |
|        | R5A           | No effects observed                       |
| CS227  | SFM           | No effects observed                       |
|        | YMA           | No effects observed                       |
|        | R5A           | No effects observed                       |

**Table S8.** Overview of the dual co-culture against *Streptomyces* sp. CS147.

| Strain | Growth medium | Outcomes in <i>Streptomyces</i> sp. CS147 |
|--------|---------------|-------------------------------------------|
| CS014  | SFM           | No effects observed                       |
|        | YMA           | No effects observed                       |
|        | R5A           | No effects observed                       |
| CS057  | SFM           | No effects observed                       |
|        | YMA           | No effects observed                       |
|        | R5A           | No effects observed                       |
| CS065a | SFM           | No effects observed                       |
|        | YMA           | No effects observed                       |
|        | R5A           | No effects observed                       |
| CS081a | SFM           | No effects observed                       |
|        | YMA           | No effects observed                       |
|        | R5A           | No effects observed                       |
| CS090a | SFM           | No effects observed                       |
|        | YMA           | No effects observed                       |
|        | R5A           | No effects observed                       |
| CS113  | SFM           | No effects observed                       |
|        | YMA           | No effects observed                       |
|        | R5A           | No effects observed                       |
| CS131  | SFM           | No effects observed                       |
|        | YMA           | No effects observed                       |
|        | R5A           | No effects observed                       |
| CS149  | SFM           | No effects observed                       |
|        | YMA           | No effects observed                       |
|        | R5A           | No effects observed                       |
| CS159  | SFM           | No effects observed                       |
|        | YMA           | No effects observed                       |
|        | R5A           | No effects observed                       |
| CS194  | SFM           | No effects observed                       |
|        | YMA           | No effects observed                       |
|        | R5A           | No effects observed                       |
| CS207  | SFM           | No effects observed                       |
|        | YMA           | No effects observed                       |
|        | R5A           | No effects observed                       |
| CS227  | SFM           | No effects observed                       |
|        | YMA           | No effects observed                       |
|        | R5A           | No effects observed                       |

**Table S9.** Overview of the dual co-culture against *Streptomyces* sp. CS149.

| Strain | Growth medium | Outcomes in <i>Streptomyces</i> sp. CS149                    |
|--------|---------------|--------------------------------------------------------------|
| CS014  | SFM           | No effects observed                                          |
|        | YMA           | No effects observed                                          |
|        | R5A           | No effects observed                                          |
| CS057  | SFM           | No effects observed                                          |
|        | YMA           | No effects observed                                          |
|        | R5A           | No effects observed                                          |
| CS065a | SFM           | No effects observed                                          |
|        | YMA           | No effects observed                                          |
|        | R5A           | No effects observed                                          |
| CS081a | SFM           | Bioactivity against <i>M. luteus</i> (rumycins) <sup>1</sup> |
|        | YMA           | No effects observed                                          |
|        | R5A           | No effects observed                                          |
| CS090a | SFM           | No effects observed                                          |
|        | YMA           | No effects observed                                          |
|        | R5A           | No effects observed                                          |
| CS113  | SFM           | No effects observed                                          |
|        | YMA           | No effects observed                                          |
|        | R5A           | No effects observed                                          |
| CS131  | SFM           | Bioactivity against <i>M. luteus</i> (rumycins) <sup>1</sup> |
|        | YMA           | No effects observed                                          |
|        | R5A           | No effects observed                                          |
| CS147  | SFM           | No effects observed                                          |
|        | YMA           | No effects observed                                          |
|        | R5A           | No effects observed                                          |
| CS159  | SFM           | No effects observed                                          |
|        | YMA           | No effects observed                                          |
|        | R5A           | No effects observed                                          |
| CS194  | SFM           | No effects observed                                          |
|        | YMA           | No effects observed                                          |
|        | R5A           | No effects observed                                          |
| CS207  | SFM           | No effects observed                                          |
|        | YMA           | No effects observed                                          |
|        | R5A           | No effects observed                                          |
| CS227  | SFM           | No effects observed                                          |
|        | YMA           | No effects observed                                          |
|        | R5A           | No effects observed                                          |

<sup>1</sup> Rumycins were only produced in coculture.

**Table S10.** Overview of the dual co-culture against *Streptomyces* sp. CS159.

| Strain | Growth medium | Outcomes in <i>Streptomyces</i> sp. CS159 |
|--------|---------------|-------------------------------------------|
| CS014  | SFM           | No effects observed                       |
|        | YMA           | No effects observed                       |
|        | R5A           | No effects observed                       |
| CS057  | SFM           | No effects observed                       |
|        | YMA           | No effects observed                       |
|        | R5A           | No effects observed                       |
| CS065a | SFM           | No effects observed                       |
|        | YMA           | No effects observed                       |
|        | R5A           | No effects observed                       |
| CS081a | SFM           | No effects observed                       |
|        | YMA           | No effects observed                       |
|        | R5A           | No effects observed                       |
| CS090a | SFM           | No effects observed                       |
|        | YMA           | No effects observed                       |
|        | R5A           | No effects observed                       |
| CS113  | SFM           | No effects observed                       |
|        | YMA           | No effects observed                       |
|        | R5A           | No effects observed                       |
| CS131  | SFM           | No effects observed                       |
|        | YMA           | No effects observed                       |
|        | R5A           | No effects observed                       |
| CS147  | SFM           | No effects observed                       |
|        | YMA           | No effects observed                       |
|        | R5A           | No effects observed                       |
| CS149  | SFM           | No effects observed                       |
|        | YMA           | No effects observed                       |
|        | R5A           | No effects observed                       |
| CS194  | SFM           | No effects observed                       |
|        | YMA           | No effects observed                       |
|        | R5A           | No effects observed                       |
| CS207  | SFM           | No effects observed                       |
|        | YMA           | No effects observed                       |
|        | R5A           | No effects observed                       |
| CS227  | SFM           | No effects observed                       |
|        | YMA           | No effects observed                       |
|        | R5A           | No effects observed                       |

**Table S11.** Overview of the dual co-culture against *Streptomyces* sp. CS194.

| Strain | Growth medium | Outcomes in <i>Streptomyces</i> sp. CS194                                                                             |
|--------|---------------|-----------------------------------------------------------------------------------------------------------------------|
| CS014  | SFM           | Bioactivity against <i>M. luteus</i> (piperazinediones?) <sup>1</sup>                                                 |
|        | YMA           | No effects observed                                                                                                   |
|        | R5A           | No effects observed                                                                                                   |
| CS057  | SFM           | Bioactivity against <i>M. luteus</i> (piperazinediones?) <sup>1</sup>                                                 |
|        | YMA           | No effects observed                                                                                                   |
|        | R5A           | No effects observed                                                                                                   |
| CS065a | SFM           | No effects observed                                                                                                   |
|        | YMA           | No effects observed                                                                                                   |
|        | R5A           | No effects observed                                                                                                   |
| CS081a | SFM           | Bioactivity against <i>M. luteus</i> (piperazinediones?) <sup>1</sup>                                                 |
|        | YMA           | No effects observed                                                                                                   |
|        | R5A           | No effects observed                                                                                                   |
| CS090a | SFM           | No effects observed                                                                                                   |
|        | YMA           | No effects observed                                                                                                   |
|        | R5A           | No effects observed                                                                                                   |
| CS113  | SFM           | Difference in the timing of the sporulation                                                                           |
|        | YMA           | No effects observed                                                                                                   |
|        | R5A           | No effects observed                                                                                                   |
| CS131  | SFM           | Difference in the timing of the sporulation                                                                           |
|        | YMA           | No effects observed                                                                                                   |
|        | R5A           | No effects observed                                                                                                   |
| CS147  | SFM           | Difference in the timing of the sporulation                                                                           |
|        | YMA           | No effects observed                                                                                                   |
|        | R5A           | No effects observed                                                                                                   |
| CS149  | SFM           | No effects observed                                                                                                   |
|        | YMA           | No effects observed                                                                                                   |
|        | R5A           | No effects observed                                                                                                   |
| CS159  | SFM           | No effects observed                                                                                                   |
|        | YMA           | No effects observed                                                                                                   |
|        | R5A           | No effects observed                                                                                                   |
| CS207  | SFM           | No effects observed                                                                                                   |
|        | YMA           | No effects observed                                                                                                   |
|        | R5A           | No effects observed                                                                                                   |
| CS227  | SFM           | Difference in the timing of the sporulation and bioactivity against <i>M. luteus</i> (piperazinediones?) <sup>1</sup> |
|        | YMA           | No effects observed                                                                                                   |
|        | R5A           | No effects observed                                                                                                   |

<sup>1</sup> It was not possible to make a comparative study of the metabolites produced by CS194 grown in monoculture vs. coculture because the strain did not grow in monoculture. Bioactive piperazinediones were detected in coculture samples and their involvement in the observed bioactivity should be taken as a hypothesis.

**Table S12.** Overview of the dual co-culture against *Streptomyces* sp. CS207.

| Strain | Growth medium | Outcomes in <i>Streptomyces</i> sp. CS207                         |
|--------|---------------|-------------------------------------------------------------------|
| CS014  | SFM           | No effects observed                                               |
|        | YMA           | Increased bioactivity against <i>E. coli</i> and <i>M. luteus</i> |
|        | R5A           | No effects observed                                               |
| CS057  | SFM           | No effects observed                                               |
|        | YMA           | Increased bioactivity against <i>E. coli</i> and <i>M. luteus</i> |
|        | R5A           | No effects observed                                               |
| CS065a | SFM           | No effects observed                                               |
|        | YMA           | No effects observed                                               |
|        | R5A           | No effects observed                                               |
| CS081a | SFM           | No effects observed                                               |
|        | YMA           | Increased bioactivity against <i>E. coli</i> and <i>M. luteus</i> |
|        | R5A           | No effects observed                                               |
| CS090a | SFM           | No effects observed                                               |
|        | YMA           | No effects observed                                               |
|        | R5A           | No effects observed                                               |
| CS113  | SFM           | No effects observed                                               |
|        | YMA           | No effects observed                                               |
|        | R5A           | No effects observed                                               |
| CS131  | SFM           | No effects observed                                               |
|        | YMA           | No effects observed                                               |
|        | R5A           | No effects observed                                               |
| CS147  | SFM           | No effects observed                                               |
|        | YMA           | No effects observed                                               |
|        | R5A           | No effects observed                                               |
| CS149  | SFM           | No effects observed                                               |
|        | YMA           | No effects observed                                               |
|        | R5A           | No effects observed                                               |
| CS159  | SFM           | No effects observed                                               |
|        | YMA           | No effects observed                                               |
|        | R5A           | No effects observed                                               |
| CS194  | SFM           | No effects observed                                               |
|        | YMA           | No effects observed                                               |
|        | R5A           | No effects observed                                               |
| CS227  | SFM           | No effects observed                                               |
|        | YMA           | Increased bioactivity against <i>E. coli</i> and <i>M. luteus</i> |
|        | R5A           | No effects observed                                               |

**Table S13.** Overview of the dual co-culture against *Streptomyces* sp. CS227.

| Strain | Growth medium | Outcomes in <i>Streptomyces</i> sp. CS227 |
|--------|---------------|-------------------------------------------|
| CS014  | SFM           | No effects observed                       |
|        | YMA           | No effects observed                       |
|        | R5A           | No effects observed                       |
| CS057  | SFM           | No effects observed                       |
|        | YMA           | No effects observed                       |
|        | R5A           | No effects observed                       |
| CS065a | SFM           | No effects observed                       |
|        | YMA           | No effects observed                       |
|        | R5A           | No effects observed                       |
| CS081a | SFM           | No effects observed                       |
|        | YMA           | No effects observed                       |
|        | R5A           | No effects observed                       |
| CS090a | SFM           | No effects observed                       |
|        | YMA           | No effects observed                       |
|        | R5A           | No effects observed                       |
| CS113  | SFM           | No effects observed                       |
|        | YMA           | No effects observed                       |
|        | R5A           | No effects observed                       |
| CS131  | SFM           | No effects observed                       |
|        | YMA           | No effects observed                       |
|        | R5A           | No effects observed                       |
| CS147  | SFM           | No effects observed                       |
|        | YMA           | No effects observed                       |
|        | R5A           | No effects observed                       |
| CS149  | SFM           | No effects observed                       |
|        | YMA           | No effects observed                       |
|        | R5A           | No effects observed                       |
| CS159  | SFM           | No effects observed                       |
|        | YMA           | No effects observed                       |
|        | R5A           | No effects observed                       |
| CS194  | SFM           | No effects observed                       |
|        | YMA           | No effects observed                       |
|        | R5A           | No effects observed                       |
| CS207  | SFM           | No effects observed                       |
|        | YMA           | No effects observed                       |
|        | R5A           | No effects observed                       |
