# Supplementary material for: Volatile Compounds in Actinomycete Communities: A New Tool for Biosynthetic Gene Cluster Activation, Cooperative Growth Promotion, and Drug Discovery
Source: Cells. 2022 Nov 5;11(21):3510. doi: 10.3390/cells11213510 (PMC9655753; doi:10.3390/cells11213510)
Supplement: Supplementary file 1 [file cells-11-03510-s001.zip › Tables S14-S18. Multiple co-cultures.pdf]

**Table S14.** Overview of the multiple co-culture against *Streptomyces* sp. CS065a.

| Strains              | Growth medium | Outcomes in <i>Streptomyces</i> sp. CS065a                                                                             |
|----------------------|---------------|------------------------------------------------------------------------------------------------------------------------|
| CS147, CS207, CS113  | SFM           | Increased bioactivity against <i>M. luteus</i> (alteramide, chromomycin) and bioactivity against <i>E. coli</i>        |
|                      | YMA           | Increased bioactivity against <i>M. luteus</i> (alteramide, chromomycin) and <i>E. coli</i>                            |
| CS147, CS207, CS090a | SFM           | Increased bioactivity against <i>M. luteus</i> (alteramide, chromomycin) and bioactivity against <i>E. coli</i>        |
|                      | YMA           | Increased bioactivity against <i>M. luteus</i> (alteramide, chromomycin) and <i>E. coli</i>                            |
| CS147, CS090a, CS113 | SFM           | No effects observed                                                                                                    |
|                      | YMA           | Increased bioactivity against <i>M. luteus</i> (alteramide, chromomycin) and showed bioactivity against <i>E. coli</i> |
| CS090a, CS207, CS113 | SFM           | Increased bioactivity against <i>M. luteus</i> (alteramide, chromomycin) and showed bioactivity against <i>E. coli</i> |
|                      | YMA           | Increased bioactivity against <i>M. luteus</i> (alteramide, chromomycin) and <i>E. coli</i>                            |

**Table S15.** Overview of the multiple co-culture against *Streptomyces* sp. CS090a.

| Strains              | Growth medium | Outcomes in <i>Streptomyces</i> sp. CS090a |
|----------------------|---------------|--------------------------------------------|
| CS147, CS207, CS113  | SFM           | No effects observed                        |
|                      | YMA           | No effects observed                        |
| CS147, CS207, CS065a | SFM           | No effects observed                        |
|                      | YMA           | No effects observed                        |
| CS147, CS065a, CS113 | SFM           | No effects observed                        |
|                      | YMA           | No effects observed                        |
| CS065a, CS207, CS113 | SFM           | No effects observed                        |
|                      | YMA           | No effects observed                        |

**Table S16.** Overview of the multiple co-culture against *Streptomyces* sp. CS113.

| Strains               | Growth medium | Outcomes in <i>Streptomyces</i> sp. CS113 |
|-----------------------|---------------|-------------------------------------------|
| CS147, CS207, CS090a  | SFM           | No effects observed                       |
|                       | YMA           | No effects observed                       |
| CS147, CS207, CS065a  | SFM           | No effects observed                       |
|                       | YMA           | No effects observed                       |
| CS147, CS065a, CS090a | SFM           | No effects observed                       |
|                       | YMA           | No effects observed                       |
| CS065a, CS207, CS090a | SFM           | No effects observed                       |
|                       | YMA           | No effects observed                       |

**Table S17.** Overview of the multiple co-culture against *Streptomyces* sp. CS147.

| Strains               | Growth medium | Outcomes in <i>Streptomyces</i> sp. CS147 |
|-----------------------|---------------|-------------------------------------------|
| CS113, CS207, CS090a  | SFM           | No effects observed                       |
|                       | YMA           | No effects observed                       |
| CS113, CS207, CS065a  | SFM           | No effects observed                       |
|                       | YMA           | No effects observed                       |
| CS113, CS065a, CS090a | SFM           | No effects observed                       |
|                       | YMA           | No effects observed                       |
| CS065a, CS207, CS090a | SFM           | No effects observed                       |
|                       | YMA           | No effects observed                       |

**Table S18.** Overview of the multiple co-culture against *Streptomyces* sp. CS207.

| Strains               | Growth medium | Outcomes in <i>Streptomyces</i> sp. CS207 |
|-----------------------|---------------|-------------------------------------------|
| CS113, CS147, CS090a  | SFM           | No effects observed                       |
|                       | YMA           | No effects observed                       |
| CS113, CS147, CS065a  | SFM           | No effects observed                       |
|                       | YMA           | No effects observed                       |
| CS113, CS065a, CS090a | SFM           | No effects observed                       |
|                       | YMA           | No effects observed                       |
| CS065a, CS147, CS090a | SFM           | No effects observed                       |
|                       | YMA           | No effects observed                       |
